# Supplementary material for: Natural Killer Repertoire Restoration in TB/HIV Co-Infected Individuals Experienced an Immune Reconstitution Syndrome (CAMELIA Trial, ANRS 12153)
Source: MDPI journal article supplement (doi:10.3390/pathogens12101241), 2023-10-13
Supplement: s1 [file s1]

## Supplementary table S1.

### A. Fluorochrome-conjugated monoclonal antibodies use for NK cell repertoire and functional analysis

| N° | Marker                    | CD nomenclature | Conjugated fluorochrome | Clone        | Cat #    | Manufacturer      |
|----|---------------------------|-----------------|-------------------------|--------------|----------|-------------------|
| 1  | CD3                       | CD3             | APC                     | UCHT1        | IM2467   | Beckman Coulter   |
| 2  | NCAM                      | CD56            | PC5                     | N901 (NKH-1) | A79388   | Beckman Coulter   |
| 3  | FcγR III                  | CD16            | PC5                     | 3G8          | A07767   | Beckman Coulter   |
| 4  | FcγR III                  | CD16            | FITC                    | 3G8          | IM0814U  | Beckman Coulter   |
| 6  | CD69                      | CD69            | PE                      | TP.1.55.3    | IM1943U  | Beckman Coulter   |
| 7  | NKG2A                     | CD159a          | PE                      | Z199         | IM3291U  | Beckman Coulter   |
| 8  | NKG2D                     | CD314           | PE                      | ON72         | A08934   | Beckman Coulter   |
| 9  | ILT2                      | CD85j           | PE                      | HP-F1        | A07408   | Beckman Coulter   |
| 10 | NKp44                     | CD336           | PE                      | Z231         | IM3710   | Beckman Coulter   |
| 11 | NKp46                     | CD335           | PE                      | BAB281       | IM3711   | Beckman Coulter   |
| 12 | NKp30                     | CD337           | PE                      | Z25          | IM3709   | Beckman Coulter   |
| 13 | KIR2DL1, KIR2DS1          | CD158a,h        | PE                      | EB6B         | A09778   | Beckman Coulter   |
| 14 | KIR2DL2, KIR2DL3, KIR2DS2 | CD158b1, b2, j  | PE                      | GL183        | IM2778U  | Beckman Coulter   |
| 15 | KIR3DL1, KIR3DS1          | CD158e1/e2      | PE                      | Z27.3.7      | IM3292   | Beckman Coulter   |
| 16 | KIR2DS4                   | CD158i          | PE                      | FES172       | IM3337   | Beckman Coulter   |
| 17 | IL-2Rbeta                 | CD122           | PE                      | CF1          | IM1978   | Beckman Coulter   |
| 18 | 2B4                       | CD244           | PE                      | C1.7         | IM1608   | Beckman Coulter   |
| 19 | KLRD1                     | CD94            | PE                      | HP-3B1       | IM2276   | Beckman Coulter   |
| 20 | CD160                     | CD160           | PE                      | BY55         | IM3657   | Beckman Coulter   |
| 21 | NKR-P1A                   | CD161           | PE                      | 191B8        | IM3450   | Beckman Coulter   |
| 22 | LAMP-1                    | CD107a          | FITC                    | H4A3         | 555800   | Beckton Dickinson |
| 23 | IFN-gamma                 | IFN gamma       | PE                      | 25723.11     | 340452   | Beckton Dickinson |
| 24 | KLRF1                     | NKp80           | PE                      | 239127       | FAB1900A | R & D System      |
| 25 | NKG2C                     | CD159c          | PE                      | 134591       | FAB138P  | R & D System      |
| 26 | DNAM-1                    | CD226           | PE                      | 102511       | FAB666P  | R & D System      |

## B. Combination of fluorochrome-conjugated monoclonal antibodies for immune-phenotyping

### 1). NK cell repertoire phenotyping

| N° | APC | PC5  | FITC | PE           |
|----|-----|------|------|--------------|
| 1  | CD3 | CD56 | CD16 | CD69         |
| 2  | CD3 | CD56 | CD16 | NKp44        |
| 3  | CD3 | CD56 | CD16 | NKp46        |
| 4  | CD3 | CD56 | CD16 | NKp30        |
| 5  | CD3 | CD56 | CD16 | NKp80        |
| 6  | CD3 | CD56 | CD16 | CD158a/h     |
| 7  | CD3 | CD56 | CD16 | CD158b1/b2/j |
| 8  | CD3 | CD56 | CD16 | CD158e       |
| 9  | CD3 | CD56 | CD16 | CD158i       |
| 10 | CD3 | CD56 | CD16 | NKG2A        |
| 11 | CD3 | CD56 | CD16 | NKG2D        |
| 12 | CD3 | CD56 | CD16 | CD94         |
| 13 | CD3 | CD56 | CD16 | NKG2C        |
| 14 | CD3 | CD56 | CD16 | CD85j        |
| 15 | CD3 | CD56 | CD16 | CD122        |
| 16 | CD3 | CD56 | CD16 | CD244        |
| 17 | CD3 | CD56 | CD16 | CD160        |
| 18 | CD3 | CD56 | CD16 | CD161        |
| 19 | CD3 | CD56 | CD16 | DNAM-1       |

### 2). NK cell cytotoxic and cytokine intracellular staining

| N° | APC | PC5       | FITC   | PE        |
|----|-----|-----------|--------|-----------|
| 1  | CD3 | CD56+CD16 | CD107a | IFN-gamma |
